# Supplementary material
Source: ML conference proceedings conference paper supplement (https://openaccess.thecvf.com/content/CVPR_2020/html/Singh_Dont_Judge_an_CVPR_2020_paper.html)
Supplement: Supplementary file 1 [file Singh_Dont_Judge_an_CVPR_2020_supplemental.pdf]

# Supplementary Material: Don’t Judge an Object by Its Context: Learning to Overcome Contextual Bias

Krishna Kumar Singh<sup>1</sup>, Dhruv Mahajan<sup>2</sup>, Kristen Grauman<sup>2,3</sup>, Yong Jae Lee<sup>1</sup>, Matt Feiszli<sup>2</sup>,  
Deepti Ghadiyaram<sup>2</sup>

<sup>1</sup>University of California, Davis, <sup>2</sup>Facebook AI, <sup>3</sup>University of Texas at Austin

## 1. Additional implementation Details

**Choosing the biased category pairs:** As mentioned in Sec. 3.1, our method is built on the following intuition: a given category  $b$  is most biased by  $c$  if (1) the prediction probability of  $b$  drops significantly in the *absence* of  $c$  and (2)  $b$  co-occurs frequently with  $c$ . Regarding (2), the co-occurring class for the biased categories appeared at least 20% of the times with the biased categories on COCO-Stuff and Animals with Attributes dataset, and 10% of the times for the DeepFashion dataset.

For the COCO-Stuff, we partition the training data into non-overlapping 80 – 20 split. We train a standard multi-label classifier with BCE loss on the 80% split and compute bias (Eq. 1) on the 20% split. For the DeepFashion, we train the classifier on the entire training data and determine the bias on the validation data. For the Animals with Attributes dataset, we need to use the test data to determine the biased classes as the test set has different distribution than the training data (test set consists of animal classes unseen during the training).

**Choice of  $\alpha_{\min}$ :**  $\alpha_{\min}$  is set to 3 for COCO-Stuff and Animals with Attributes, whereas it is set to 5 for DeepFashion dataset. We found these values through cross-validation. During inference, a single forward pass of an image takes 0.2 ms on a single Titan X GPU.

## 2. More results

**Another baseline *split biased*:** In addition to all baselines we describe in the main text, we also designed another baseline: *split biased*. For this, we split each  $b$  into two categories: (1)  $b \setminus c$  and (2)  $b \cap c$ . This setup adds  $K$  additional categories to each dataset and explicitly separates the two scenarios (exclusive and co-occur) for biased categories. This baseline is similar to [4], where a separate classifier is learned for a visual phrase consisting of objects associated with a relation (e.g. “person riding horse”). Here,

| Methods                   | Exclusive | Co-occur |
|---------------------------|-----------|----------|
| <i>split biased</i>       | 19.1      | 64.3     |
| <i>ours-CAM</i>           | 26.4      | 64.9     |
| <i>ours-feature-split</i> | 28.8      | 66.0     |

Table 1. **Performance on COCO-Stuff** for the 20 most biased categories. *ours-CAM* and *ours-feature-split* outperform *split biased* with significant margin on both exclusive and co-occurring images.

| Methods                   | 60 non biased categories | 171 object + stuff |
|---------------------------|--------------------------|--------------------|
| <i>standard</i>           | 75.4                     | 57.2               |
| <i>ours-CAM</i>           | 75.2                     | 57.0               |
| <i>ours-feature-split</i> | 75.2                     | 57.1               |

Table 2. **mAP of the non-biased object classes** and entire object+ stuff classes. Our approach loses only negligible mAP compared to *standard* classifier in these cases.

instead of visual phrases, we learn a separate classifier for each co-occurring biased class pair.

### 2.1. Object Classification

**Comparison with *split biased*:** Results in Table 1 shows that *ours-feature-split* outperforms *split biased* with a significant margin on COCO-Stuff (28.8 vs. 19.1). Also, *ours-CAM* gives much better performance than *split biased* (26.4 vs. 19.1). Given that *split biased* cannot take full advantage of the co-occurring images (and vice-versa), it has inferior performance compared to both our methods.

**Performance on non-biased classes:** In Table 2, we show the mAP of our approach and *standard* classifier on the non-biased object classes (60 classes) and on the entire COCO-Stuff dataset (*object + stuff*, 171 classes). We can see that our approach very marginally ( 0.02%) reduces the performance on non-biased object and stuff classes, while improving performance when biased categories occur away from their context.

#### Measuring cosine-similarity between $W_o$ and $W_s$ :

We verify that  $W_o$  and  $W_s$  capture distinct information by computing a cosine similarity metric between them. From Table 3, we observe that both our approaches yield a lower similarity score compared to *standard*.

| Methods                   | Cosine-similarity |
|---------------------------|-------------------|
| <i>standard</i>           | 0.21              |
| <i>ours-CAM</i>           | 0.19              |
| <i>ours-feature-split</i> | 0.17              |

Table 3. **Cosine similarity** between classifier weights of the biased class pairs (b,c). Our approach reduces the similarity between them indicating the biased class b is less dependent on c for prediction.

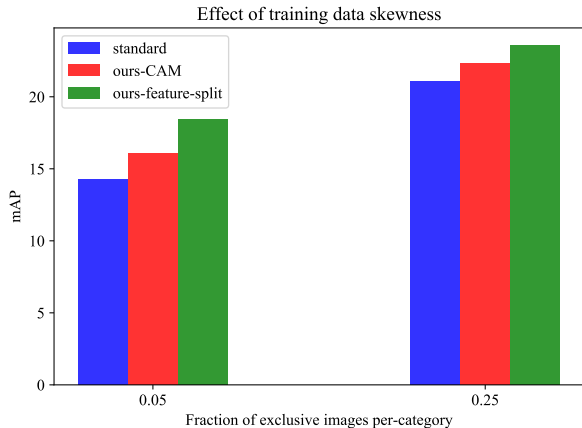

Figure 1. mAP of *standard*, *ours-CAM*, and *ours-feature-split* classifier by varying fraction of exclusive images during training. If ratio is more skewed then we get a bigger boost for the exclusive cases.

**Per class mAP and co-occurrence bias for 20 biased classes:** In the Table 6, we show per class results for the COCO-Stuff for the top 20 biased classes. We also show the co-occurrence bias value for each class computed according to Eq. 1 in the main paper. From these results, we may observe that when a category occurs out of its context *ours-feature-split* gives better performance compared to *standard* classifier while maintaining the performance when a category co-occurs with context. *ours-CAM* performs better than *standard* when a category occurs away from its context, but struggles when categories co-occur.

**Ablation study of *ours-feature-split* by varying fraction of biased category images:** Here, we study the performance of our method as we vary the fraction of training images with biased categories occurring away from their typical context for COCO-Stuff. Specifically, for each of the 20 biased categories in COCO-Stuff, we fix the total number of training images and vary the fraction of exclusive images. From Fig. 1, we note that *standard* performs rather poorly at lower fractions compared to both approaches (*ours-CAM* and *ours-feature-split*). Thus, both proposed methods achieve higher boosts at a fraction of 0.05 compared to 0.25. We also observe that a higher fraction of exclusive images benefits all the approaches, yet, our methods consistently outperform *standard*. This indicates that our approaches are more robust than the baseline especially on heavily skewed training data.

| Methods                         | Exclusive  | Co-occur    |
|---------------------------------|------------|-------------|
| <i>standard</i>                 | 4.9        | 17.8        |
| <i>split biased</i>             | 3.5        | 14.3        |
| <i>remove co-occur labels</i>   | 6.0        | <b>20.4</b> |
| <i>remove co-occur images</i>   | 4.2        | 5.4         |
| <i>negative penalty</i>         | 5.5        | 18.9        |
| <i>class balancing loss</i> [1] | 5.2        | 19.4        |
| <i>ours-feature-split</i>       | <b>9.2</b> | 20.1        |

Table 4. **Top-3 recall on DeepFashion** for the 20 most biased attributes. *ours-feature-split* yields a significant boost over all approaches for the exclusive test split, without hurting performance on the co-occurring split. *ours-CAM* is not extensible to attributes hence not reported here. The above baseline methods are described in our main paper.

| Methods                            | Exclusive   | Co-occur    |
|------------------------------------|-------------|-------------|
| <i>standard</i>                    | 19.4        | 72.2        |
| <i>split biased</i>                | 19.7        | 66.8        |
| <i>remove co-occur labels</i>      | 19.1        | 62.9        |
| <i>remove co-occur images</i>      | <b>22.7</b> | 58.3        |
| <i>negative penalty</i>            | 19.2        | 68.4        |
| <i>class balancing loss</i> [1]    | 20.4        | 68.4        |
| <i>attribute decorrelation</i> [2] | 18.4        | 70.2        |
| <i>ours-feature-split</i>          | 20.8        | <b>72.8</b> |

Table 5. **Performance on Animals with Attributes** for the 20 most biased attributes. Our proposed method *ours-feature-split* outperforms other methods. *ours-CAM* is not extensible to attributes hence not reported here.

## 2.2. Comparison with other baselines for attribute classification

Table 4 reports performance on DeepFashion [3]. We outperform all baselines by a significant margin on the exclusive test set. Although *remove co-occur labels* has slightly higher performance when attributes co-occur (20.4 vs. 20.1), *ours-feature-split* performs significantly better when attributes occur exclusively (6.0 vs. 9.2).

From Table 5, we observe that *ours-feature-split* offers gains on the exclusive test split compared to most methods for Animals with Attributes dataset. Though *remove co-occur images* yields higher gains on the exclusive test split, unlike *ours-feature-split*, it severely hurts the performance of co-occurring cases. Meanwhile *ours-feature-split* achieves good gains in exclusive cases without hurting co-occurring cases.

Finally, in Table 7 and 8, we show per category performance for the top 20 biased categories for two datasets: DeepFashion and Animals with Attributes. These results show that *ours-feature-split* gives better performance than the *standard* classifier when attributes occur exclusively without their co-occurring context. At the same time, *ours-feature-split* maintains performance when biased attribute categories appear with co-occurring context.

## References

- [1] Yin Cui, Menglin Jia, Tsung-Yi Lin, Yang Song, and Serge Belongie. Class-balanced loss based on effective number of samples. In *CVPR*, 2019. 2

| Classes        |                |        | Exclusive       |                 |                           | Co-occur        |                 |                           |
|----------------|----------------|--------|-----------------|-----------------|---------------------------|-----------------|-----------------|---------------------------|
| Biased class   | Co-occur class | Bias   | <i>standard</i> | <i>ours-CAM</i> | <i>ours-feature-split</i> | <i>standard</i> | <i>ours-CAM</i> | <i>ours-feature-split</i> |
| cup            | dining table   | 1.76   | 33.0            | 35.4            | 27.4                      | 68.1            | 63.0            | 70.2                      |
| wine glass     | person         | 1.8    | 35.0            | 36.3            | 35.1                      | 57.9            | 57.4            | 57.3                      |
| handbag        | person         | 1.81   | 3.8             | 5.1             | 4.0                       | 42.8            | 41.4            | 42.7                      |
| apple          | fruit          | 1.91   | 29.2            | 29.8            | 30.7                      | 64.7            | 64.4            | 64.1                      |
| car            | road           | 1.94   | 36.7            | 38.2            | 36.6                      | 79.7            | 78.5            | 79.2                      |
| bus            | road           | 1.94   | 40.7            | 41.6            | 43.9                      | 86.0            | 85.3            | 85.4                      |
| potted plant   | vase           | 1.99   | 37.2            | 37.8            | 36.5                      | 50.0            | 46.8            | 46.0                      |
| spoon          | bowl           | 2.04   | 14.7            | 16.3            | 14.3                      | 42.7            | 35.9            | 42.6                      |
| microwave      | oven           | 2.08   | 35.3            | 36.6            | 39.1                      | 60.9            | 60.1            | 59.6                      |
| keyboard       | mouse          | 2.25   | 44.6            | 42.9            | 47.1                      | 85.0            | 83.3            | 85.1                      |
| skis           | person         | 2.28   | 2.8             | 7.0             | 27.0                      | 91.5            | 91.3            | 91.2                      |
| clock          | building       | 2.39   | 49.6            | 50.5            | 45.5                      | 84.5            | 84.7            | 86.4                      |
| sports ball    | person         | 2.45   | 12.1            | 14.7            | 22.5                      | 75.5            | 75.3            | 74.2                      |
| remote         | person         | 2.45   | 23.7            | 26.9            | 21.2                      | 70.5            | 67.4            | 72.7                      |
| snowboard      | person         | 2.86   | 2.1             | 2.4             | 6.5                       | 73.0            | 72.7            | 72.6                      |
| toaster        | ceiling        | 3.7    | 7.6             | 7.7             | 6.4                       | 5.0             | 5.0             | 4.4                       |
| hair drier     | towel          | 4      | 1.5             | 1.3             | 1.7                       | 6.2             | 6.2             | 6.9                       |
| tennis racket  | person         | 4.15   | 53.5            | 59.7            | 61.7                      | 97.6            | 97.5            | 97.5                      |
| skateboard     | person         | 7.36   | 14.8            | 22.6            | 34.4                      | 91.3            | 91.1            | 90.8                      |
| baseball glove | person         | 339.15 | 12.3            | 14.4            | 34.0                      | 91.0            | 91.3            | 91.1                      |
| Mean           | -              | -      | 24.5            | 26.4            | <b>28.8</b>               | <b>66.2</b>     | 64.9            | 66.0                      |

Table 6. COCO-Stuff dataset. Per class mAP and bias for 20 most biased classes. *ours-feature-split* outperforms *standard* on the exclusive set while maintaining the performance on the co-occurring cases.

| Classes      |                |      | Exclusive       |                           | Co-occur        |                           |
|--------------|----------------|------|-----------------|---------------------------|-----------------|---------------------------|
| Biased class | Co-occur class | Bias | <i>standard</i> | <i>ours-feature-split</i> | <i>standard</i> | <i>ours-feature-split</i> |
| bell         | lace           | 3.15 | 5.4             | 22.8                      | 3.1             | 9.4                       |
| cut          | bodycon        | 3.3  | 8.6             | 12.5                      | 29.3            | 36.2                      |
| animal       | print          | 3.31 | 0.0             | 1.9                       | 1.9             | 2.8                       |
| flare        | fit            | 3.31 | 18.4            | 32.0                      | 56.0            | 62.0                      |
| embroidery   | crochet        | 3.44 | 4.1             | 1.8                       | 4.8             | 0.0                       |
| suede        | fringe         | 3.48 | 12.0            | 19.6                      | 65.2            | 73.9                      |
| jacquard     | flare          | 3.68 | 0.0             | 0.9                       | 0.0             | 9.1                       |
| trapeze      | striped        | 3.7  | 8.7             | 29.9                      | 42.9            | 50.0                      |
| neckline     | sweetheart     | 3.98 | 0.0             | 0.0                       | 0.0             | 0.0                       |
| retro        | chiffon        | 4.08 | 0.0             | 0.4                       | 0.0             | 0.0                       |
| sweet        | crochet        | 4.32 | 0.0             | 0.5                       | 0.0             | 0.0                       |
| batwing      | loose          | 4.36 | 11.0            | 12.0                      | 27.5            | 15.0                      |
| tassel       | chiffon        | 4.48 | 13.0            | 16.8                      | 25.0            | 25.0                      |
| boyfriend    | distressed     | 4.5  | 11.6            | 11.6                      | 49.2            | 38.1                      |
| light        | skinny         | 4.53 | 2.0             | 1.3                       | 14.9            | 8.5                       |
| ankle        | skinny         | 4.56 | 1.0             | 14.6                      | 13.2            | 27.9                      |
| french       | terry          | 5.09 | 0.0             | 0.8                       | 9.6             | 7.9                       |
| dark         | wash           | 5.13 | 2.6             | 2.1                       | 8.7             | 13.0                      |
| medium       | wash           | 7.45 | 0.0             | 0.0                       | 0.0             | 0.0                       |
| studded      | denim          | 7.8  | 0.0             | 3.2                       | 4.0             | 24.0                      |
| Mean         | -              | -    | 4.9             | <b>9.2</b>                | 17.8            | <b>20.1</b>               |

Table 7. DeepFashion dataset. Per class top-3 recall and bias for 20 most biased classes. *ours-feature-split* outperforms *standard* on the exclusive set while maintaining the performance on the co-occurring cases.

| Classes      |                |        | Exclusive       |                           | Co-occur        |                           |
|--------------|----------------|--------|-----------------|---------------------------|-----------------|---------------------------|
| Biased class | Co-occur class | Bias   | <i>standard</i> | <i>ours-feature-split</i> | <i>standard</i> | <i>ours-feature-split</i> |
| white        | ground         | 3.67   | 24.8            | 24.6                      | 85.8            | 86.2                      |
| longleg      | domestic       | 3.71   | 18.5            | 29.1                      | 89.4            | 89.3                      |
| forager      | nestspot       | 4.02   | 33.6            | 33.4                      | 96.6            | 96.5                      |
| lean         | stalker        | 4.46   | 11.5            | 12.0                      | 54.5            | 55.8                      |
| fish         | timid          | 5.14   | 60.2            | 57.4                      | 98.3            | 98.3                      |
| hunter       | big            | 5.34   | 4.1             | 3.6                       | 32.9            | 30.0                      |
| plains       | stalker        | 5.4    | 6.4             | 6.0                       | 44.7            | 59.9                      |
| nocturnal    | white          | 5.84   | 13.3            | 13.1                      | 71.2            | 60.5                      |
| nestspot     | meatteeth      | 5.92   | 13.4            | 14.9                      | 62.8            | 67.6                      |
| jungle       | muscle         | 6.26   | 33.3            | 31.3                      | 88.6            | 86.6                      |
| muscle       | black          | 6.39   | 9.3             | 9.3                       | 76.6            | 73.6                      |
| meat         | fish           | 7.12   | 4.5             | 3.8                       | 76.1            | 73.6                      |
| mountains    | paws           | 9.24   | 10.9            | 10.0                      | 49.9            | 39.9                      |
| tree         | tail           | 10.98  | 36.5            | 55.0                      | 93.2            | 92.7                      |
| domestic     | inactive       | 11.77  | 11.9            | 13.1                      | 73.7            | 76.6                      |
| spots        | longleg        | 20.15  | 43.8            | 45.2                      | 61.8            | 59.1                      |
| bush         | meat           | 29.47  | 19.8            | 22.1                      | 70.2            | 75.1                      |
| buckteeth    | smelly         | 34.01  | 7.8             | 8.9                       | 27.1            | 45.3                      |
| slow         | strong         | 76.59  | 15.5            | 14.6                      | 95.8            | 93.3                      |
| blue         | coastal        | 319.98 | 8.4             | 8.2                       | 94.2            | 95.8                      |
| Mean         | -              | -      | 19.4            | <b>20.8</b>               | 72.2            | <b>72.8</b>               |

Table 8. Animals with Attributes dataset. Per class mAP and bias for 20 most biased classes. *ours-feature-split* outperforms *standard* on the exclusive set while maintaining the performance on the co-occurring cases.

In *CVPR*, 2014. [2](#)

- [3] Ziwei Liu, Ping Luo, Shi Qiu, Xiaogang Wang, and Xiaoou Tang. Deepfashion: Powering robust clothes recognition and retrieval with rich annotations. In *CVPR*, 2016. [2](#)
- [4] Mohammad Amin Sadeghi and Ali Farhadi. Recognition using visual phrases. In *CVPR*, 2011. [1](#)
